# Supplementary material for: Impact of Midregional N‐Terminal Pro–Atrial Natriuretic Peptide and Soluble Suppression of Tumorigenicity 2 Levels on Heart Rhythm in Patients Treated With Catheter Ablation for Atrial Fibrillation: The Biorhythm Study
Source: PubMed Central journal article supplement — J Am Heart Assoc. 2021 Jun 30;10(13):e020917. doi: 10.1161/JAHA.121.020917 (PMC8403329; doi:10.1161/jaha.121.020917), 2021-06-30

# **Supplemental Material**

**Table S1. Procedural data and complications in patients with and without recurrence of atrial fibrillation after catheter ablation.**

|                                                    | <b>Total (N=105)</b> | <b>No recurrence<br/>(n=71)</b> | <b>Recurrence<br/>(n=34)</b> | <b>P value</b> |
|----------------------------------------------------|----------------------|---------------------------------|------------------------------|----------------|
| Sinus rhythm at start of procedure                 | 68 (64.7)            | 48 (67.6)                       | 20 ( 58.8)                   | 0.39*          |
| <b>Catheter ablation techniques</b>                |                      |                                 |                              |                |
| Cryoballoon ablation                               | 38 (36.2)            | 24 (22.9)                       | 14 (13.3)                    | 0.46*          |
| Radiofrequency ablation                            | 67 (63.8)            | 47 (66.2)                       | 20 (58.8)                    | 0.46*          |
| Pulmonary-vein isolation                           | 104 (99.0)           | 71 (100)                        | 33 (97.1)                    | 0.14*          |
| Ablation of CFAEs                                  | 14 (13.3)            | 8 (11.3)                        | 6 (17.6)                     | 0.37*          |
| Linear ablation across the roof                    | 11 (10.6)            | 2 (2.9)                         | 9 (26.5)                     | <0.01*         |
| Linear ablation in mitral valve isthmus            | 3 (2.9)              | 1 (2.8)                         | 2 (2.9)                      | 0.97*          |
| Linear ablation in IVC-tricuspid annulus isthmus   | 10 (9.5)             | 6 (8.5)                         | 4 (12.9)                     | 0.59*          |
| Total procedure duration (minutes), median [Q1-Q3] | 115 [90-150]         | 105 [90-143.75]                 | 120 [90-150]                 | 0.32†          |
| <b>Procedural adverse events</b>                   |                      |                                 |                              |                |
| Groin site complication                            | 1 (0.9)              | 0 (0)                           | 1 (2.9)                      | 0.32‡          |
| Cardiac tamponnade                                 | 0 (0)                | 0 (0)                           | 0 (0)                        |                |
| TIA or stroke                                      | 2 (1.9)              | 1 (1.4)                         | 1 (2.9)                      | 0.60‡          |
| Phrenic nerve injury                               | 1 (0.9)              | 1 (1.4)                         | 0 (0)                        | 0.49‡          |
| Other complications                                | 2 (1.9)              | 0 (0)                           | 2 (5.9)                      | 0.04‡          |
| <b>Rhythm control therapy at discharge</b>         |                      |                                 |                              |                |

|                                            |           |           |           |       |
|--------------------------------------------|-----------|-----------|-----------|-------|
| Antiarrhythmic drugs (all)                 | 62 (59.0) | 42 (59.2) | 20 (58.8) | 0.97* |
| Sotalol                                    | 10 (9.5)  | 7 (9.9)   | 3 (8.8)   | 0.87‡ |
| Amiodarone                                 | 19 (18.1) | 11 (15.5) | 8 (23.5)  | 0.32‡ |
| Flecainide                                 | 15 (14.3) | 12 (16.9) | 3 (8.8)   | 0.27‡ |
| Beta blockers                              | 42 (0.40) | 26 (36.6) | 16 (47.1) | 0.31* |
| <b>Rhythm control therapy at follow-up</b> |           |           |           |       |
| Antiarrhythmic drugs (all)                 | 41 (39.0) | 25 (35.2) | 16 (47.1) | 0.25* |
| Sotalol                                    | 7 (6.7)   | 4 (5.6)   | 3(8.8)    | 0.87‡ |
| Amiodarone                                 | 9 (8.6)   | 5 (7.0)   | 4 (11.8)  | 0.81‡ |
| Flecainide                                 | 5 (4.8)   | 3 (4.2)   | 2 (5.9)   | 0.93‡ |
| Beta blockers                              | 30 (28.6) | 18 (25.4) | 12 (35.3) | 0.56* |

CFAEs: Complex Fractionated Atrial Electrograms; min: Minutes; TIA: Transient Ischemic Attack.

Other complications: 1 mitral valve perforation, 1 pulmonary oedema

[Q1-Q3]: quartiles [25th and 75th percentiles]

\*Chi square test

† Mann Whitney test

‡ Fisher's exact test

**Figure S1. Correlation between MRproANP levels in the left and right atria, and in peripheral venous blood.**

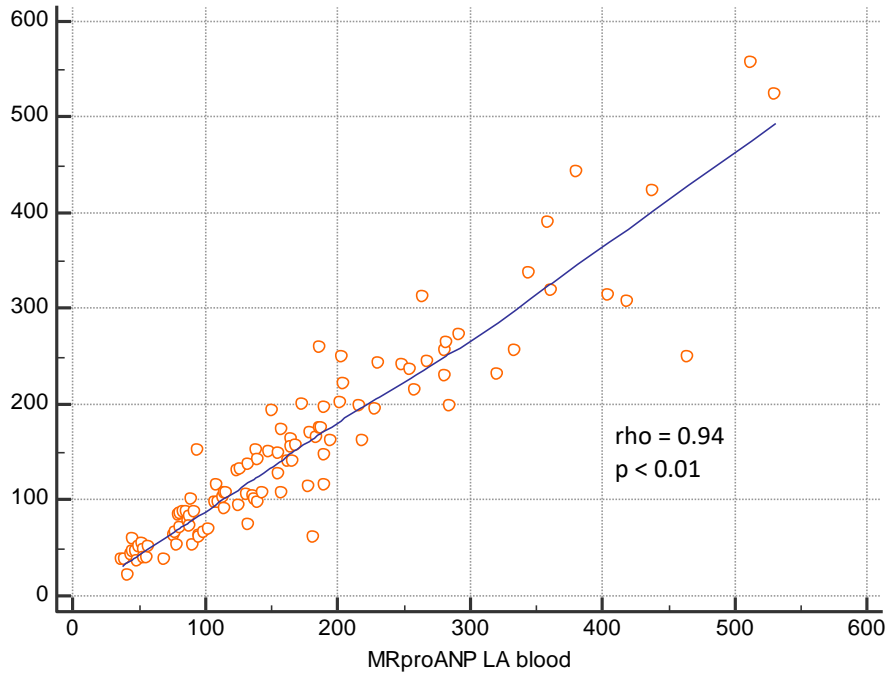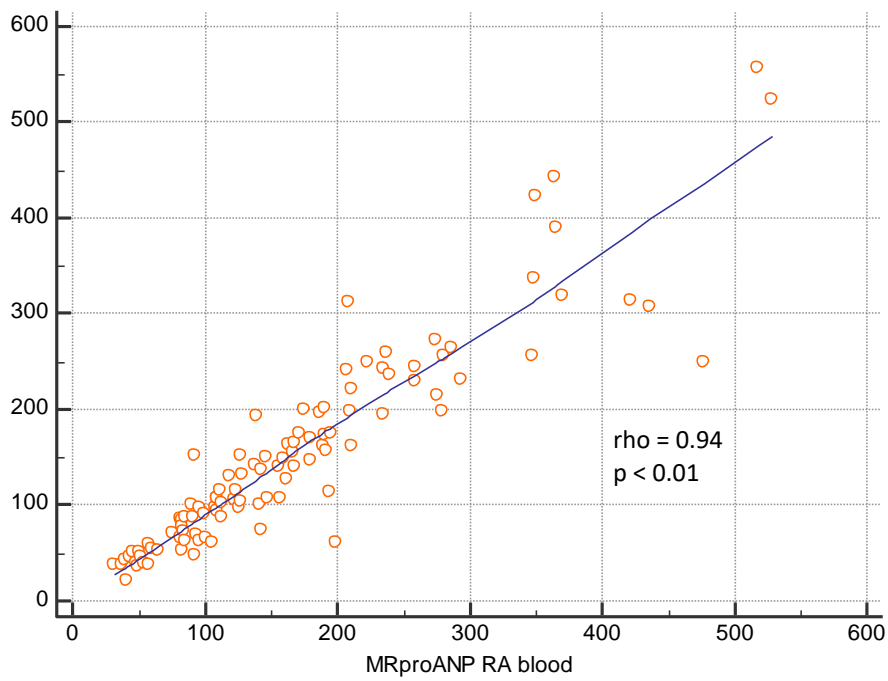

**Figure S2. Correlation between MRproANP (pmol/L) concentration in peripheral venous blood, and in the left atrium (LA blood) and right atrium (RA blood) prior to the catheter ablation procedure.**

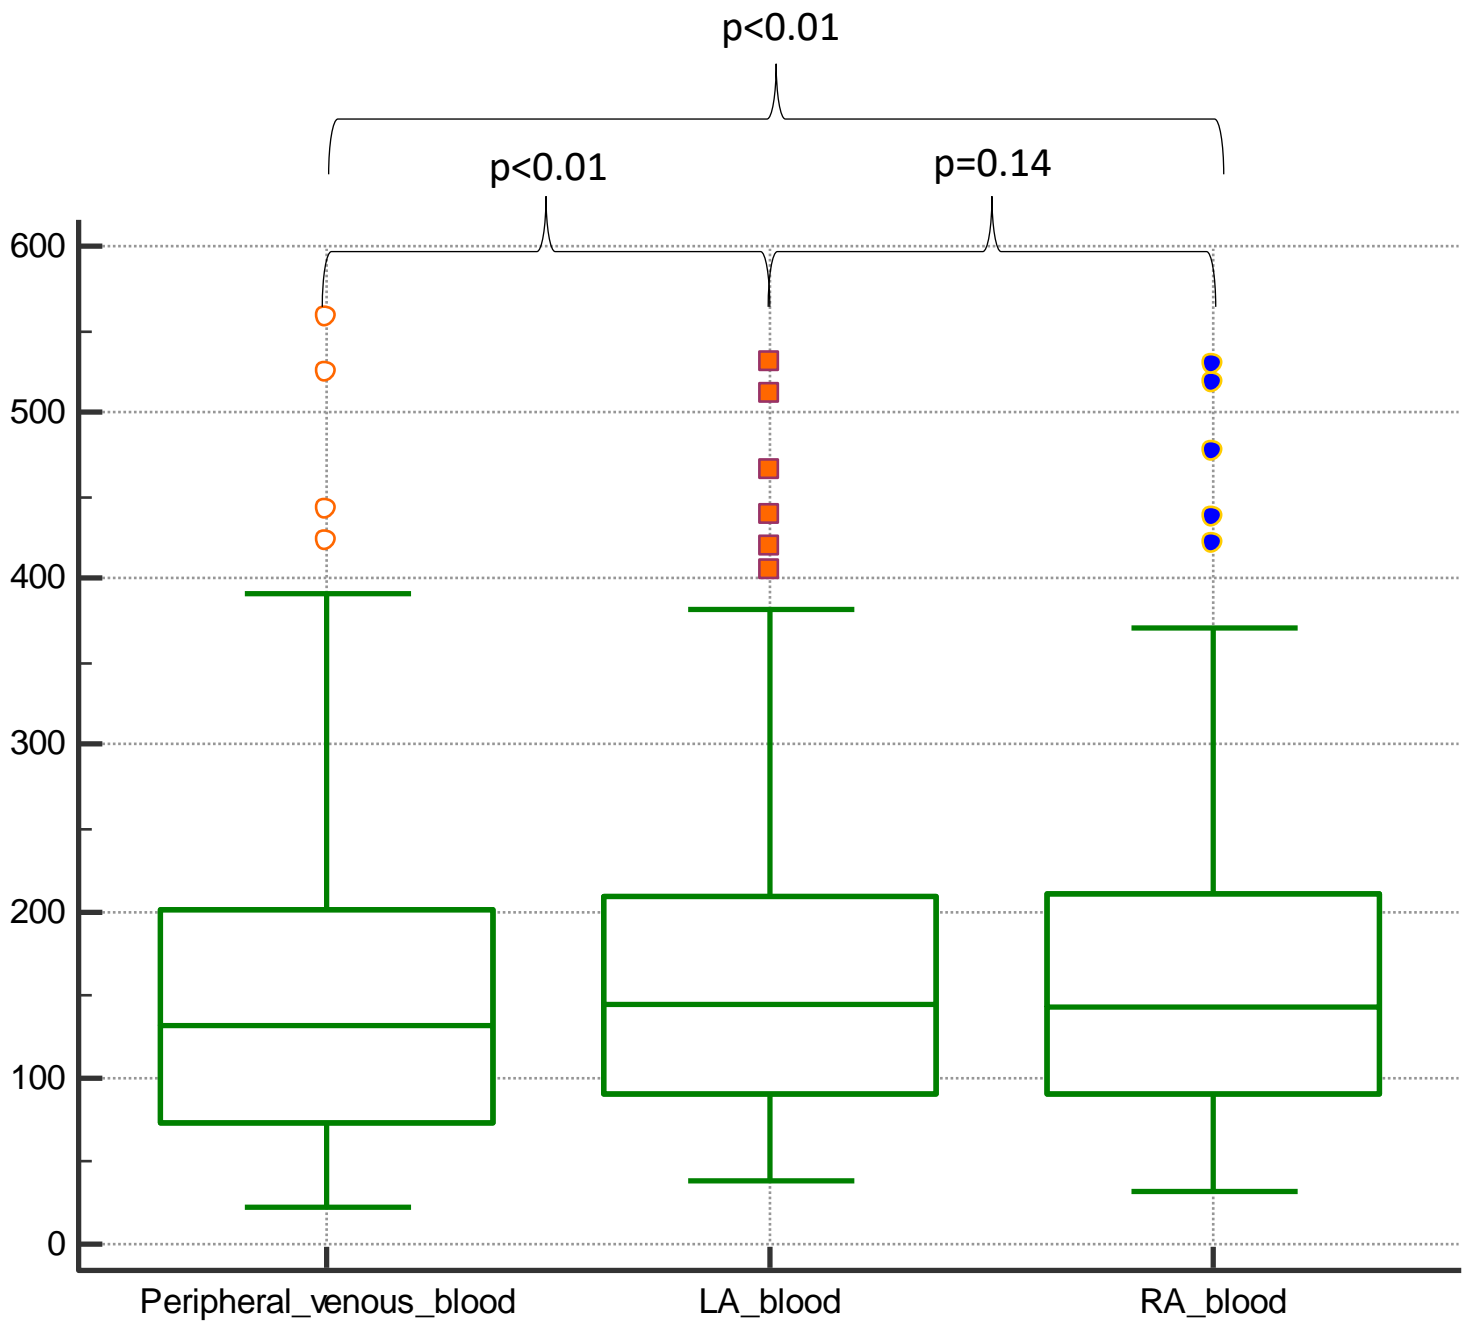

**Figure S3. MRproANP (pmol/L) concentration in the left atrium (LA blood) and right atrium (RA blood) prior to the catheter ablation procedure in patients in atrial fibrillation and in patients in sinus rhythm at the time of the blood draw.**

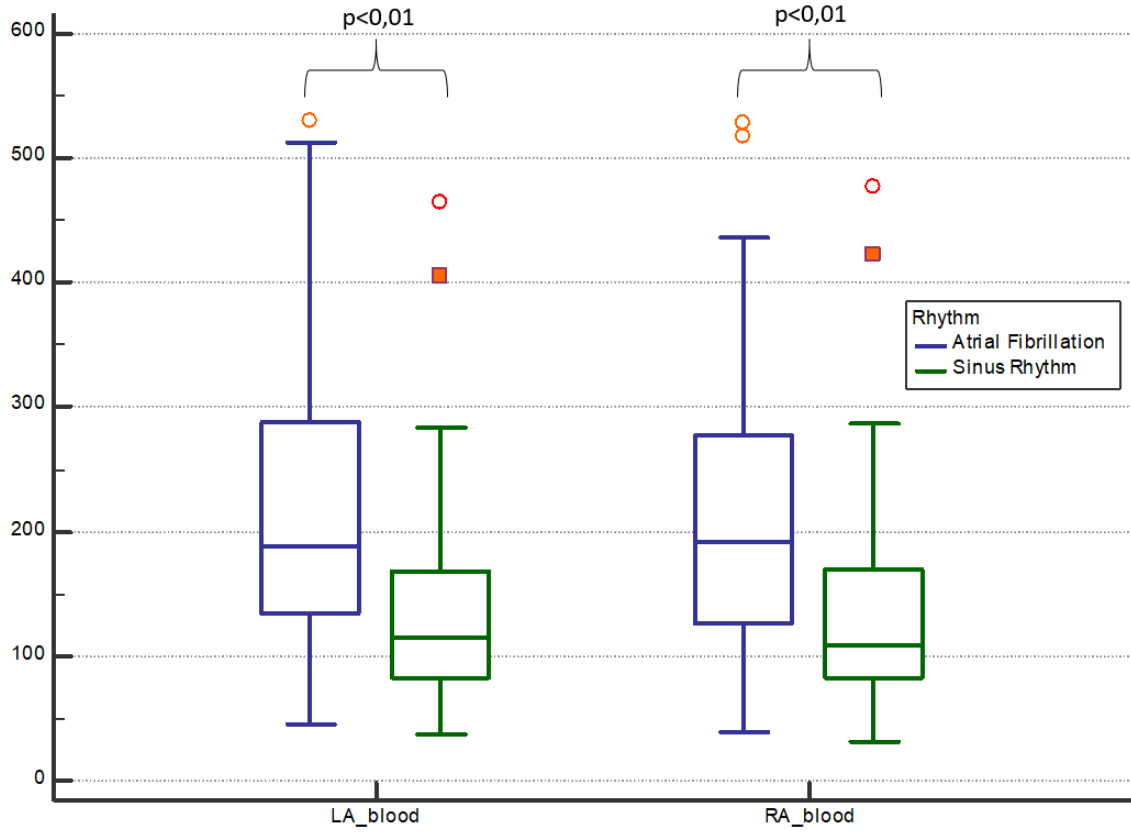

**Figure S4. Correlation between MRproANP and sST2 levels measured prior to the procedure in peripheral venous blood, and left atrial area.**

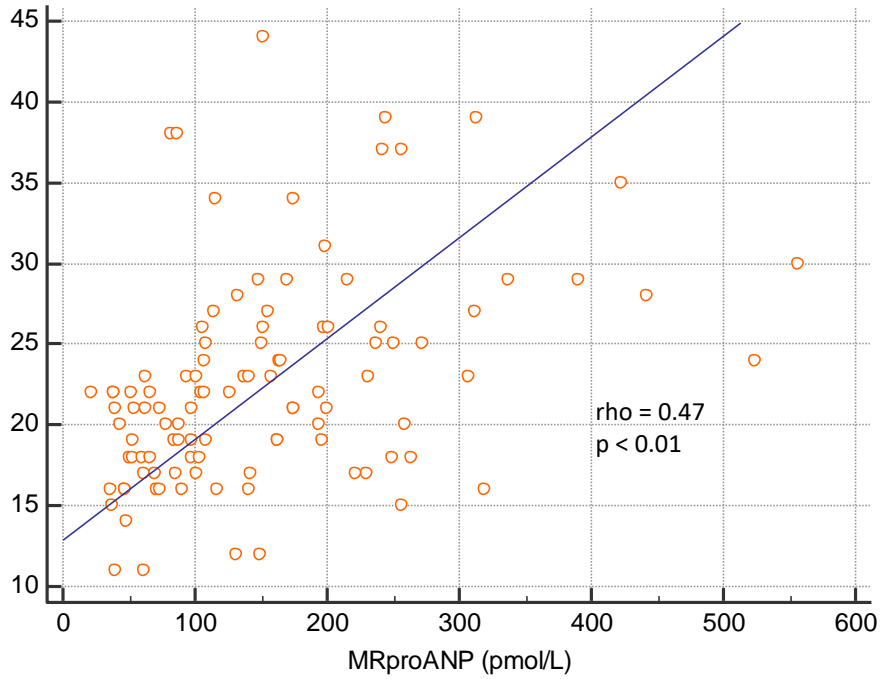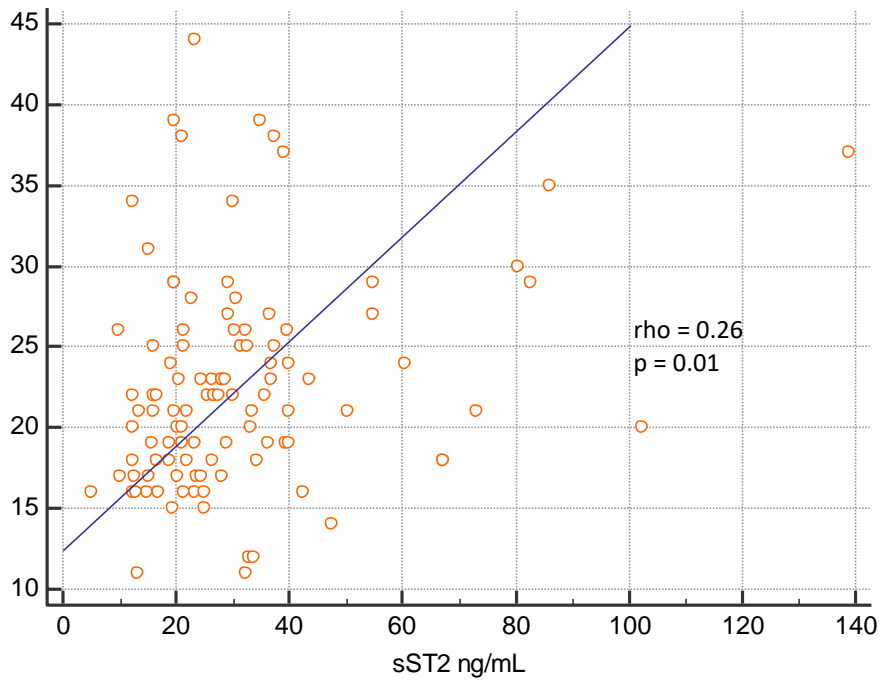

Supplement: JAH3-10-e020917-s001.pdf [file JAH3-10-e020917-s001.pdf]
